# Supplementary material
Source: PubMed Central journal article supplement (PMC2778218)
Supplement: NIHMS14494-supplement-01.pdf [file NIHMS14494-supplement-01.pdf]

**Supplemental Table 1.** Tissue lysate array antibodies.

| Antibody    | Titer  | Source                      |
|-------------|--------|-----------------------------|
| EGFR        | 1:100  | Cell Signaling, Beverly, MA |
| AKT         | 1:100  |                             |
| AKT-S473    | 1:100  |                             |
| ERK         | 1:1000 |                             |
| pERK        | 1:2000 |                             |
| pEGFR Y1148 | 1:100  | Biosource, Camarillo, CA    |
